# Supplementary material
Source: HighWire-hosted journal article supplement (https://msphere.asm.org/content/2/2/e00003-17)
Supplement: inline-supplementary-material-2 [file inline-supplementary-material-2.pdf]

**Table S1**

|             | <b>Non-synchronized</b> | <b>L-D synchronized</b> | <b>M-N synchronized</b> | <b>F-L synchronized</b> |
|-------------|-------------------------|-------------------------|-------------------------|-------------------------|
| <b>Mean</b> | 11.54                   | 11.35                   | 12.11                   | 11.83                   |
| <b>SD</b>   | 1.401                   | 0.9614                  | 1.059                   | 0.8633                  |
