# Supplementary material
Source: HighWire-hosted journal article supplement (https://msphere.asm.org/content/2/2/e00003-17)
Supplement: inline-supplementary-material-5 [file inline-supplementary-material-5.pdf]

**Table S3**

| <b>Chem-ical</b> |         | <b>Non-synchronized</b> |       | <b>L-D synchronized</b> |        | <b>M-N synchronized</b> |        | <b>F-L synchronized</b> |        |
|------------------|---------|-------------------------|-------|-------------------------|--------|-------------------------|--------|-------------------------|--------|
|                  |         | Mean                    | SD    | Mean                    | SD     | Mean                    | SD     | Mean                    | SD     |
| <b>IBMX</b>      | Control | 11.03                   | 1.225 | 10.65                   | 1.029  | 11.35                   | 0.9315 | 10.70                   | 1.029  |
|                  | Treated | 7.063                   | 1.103 | 5.965                   | 1.122  | 6.657                   | 1.015  | 5.863                   | 1.015  |
| <b>LatB</b>      | Control | 12.11                   | 1.052 | 10.65                   | 1.029  | 11.31                   | 1.200  | 11.63                   | 0.8298 |
|                  | Treated | 9.122                   | 1.337 | 7.965                   | 1.164  | 9.079                   | 1.155  | 8.407                   | 0.8109 |
| <b>NaPPi</b>     | Control | 11.07                   | 1.195 | 10.42                   | 0.8714 | 10.89                   | 0.8654 | 11.94                   | 0.8855 |
|                  | Treated | 7.54                    | 1.165 | 6.198                   | 1.141  | 7.244                   | 1.324  | 6.449                   | 0.8925 |
| <b>LiCl</b>      | Control | 11.33                   | 1.118 | 10.42                   | 0.8714 | 12.10                   | 1.051  | 12.13                   | 0.8005 |
|                  | Treated | 14.49                   | 2.342 | 14.68                   | 1.479  | 15.53                   | 2.487  | 16.94                   | 1.468  |
